# Supplementary material for: Oligonucleotide duplexes containing N8-glycosylated 8-aza-7-deazaguanine and self-assembly of 8-aza-7-deazapurines on the nucleoside and the oligomeric level
Source: Royal Society of Chemistry journal article supplement (doi:10.1039/b309485p), 2003-01-01
Supplement: b309485p.doc [file b309485p.doc]

# Supplementary data

| **Table 2** Tm Values and thermodynamic data of non-selfcomplementary antiparallel-stranded oligonucleotide duplexes containing N8-linked 8-aza-7-deaza-2’-deoxyguanosine (**1**) hybridized against d(iC) and dC a, b | | | | | |
| --- | --- | --- | --- | --- | --- |
|  |  | Tm [°C] | H° [kcal/mol] | S° [cal/(mol K)] | G°310 [kcal/mol] |
| 5’-d(TAG GTC AAT ACT) 3’-d(ATC CAG TTA TGA) | **15 16** | 51 | -85 | -237 | -11.6 |
| 5’-d(TAG **iG**TC AAT ACT)14 3’-d(ATC **iC**AG TTA TGA) | **17 18** | 54 | -102 | -286 | -13.5 |
| 5’-d(TAG GT**iC** AAT ACT)14 3’-d(ATC CA**iG** TTATGA) | **19 20** | 54 | -95 | -263 | -13.4 |
| 5’-d(TAG **1** TC AAT ACT)  3’-d(ATC **iC**AG TTATGA) | **23 18** | 48 | -93 | -264 | -10.9 |
| 5’-d(TAG GT**iC** AAT ACT) 3’-d(ATC CA **1** TTA TGA) | **19 24** | 51 | -101 | -285 | -12.3 |
| 5’-d(AT**iC iC**A**1** TTA T**1**A)  3’-d(TA **1** **1**T**iC** AAT A**iC**T) | **25 26** | 40 | -79 | -227 | -8.9 |
| 5’-d(TAG **1** TC AAT ACT) 3’-d(ATC **C**AG TTA TGA) | **23 16** | 36 | -71 | -204 | -7.5 |
| 5’-d(TAG GT**C** AAT ACT) 3’-d(ATC CA**1** TTA TGA) | **15 24** | 35 | -72 | -208 | -7.2 |
| a Measured in 1 M NaCl, 0.1 M MgCl2, 60 mM sodiumcacodylate buffer, pH 7.   5 M + 5 M Oligonucleotide concentration. b d(iC) = m5isoCd = 2’-Deoxy-5-methylisocytidine. | | | | | |

| **Table 3** Tm Values and thermodynamic data of non-selfcomplementary antiparallel-stranded oligonucleotide duplexes containing N8-linked 8-aza-7-deaza-2’-deoxyguanosine (**1**) hybridized against dG, **1**, dT and dAa | | | | | |
| --- | --- | --- | --- | --- | --- |
|  |  | Tm [°C] | H° [kcal/mol] | S° [cal/(mol K)] | G°310 [kcal/mol] |
| 5’-d(TAG **1** TC AAT ACT) 3’-d(ATC **G**AG TTA TGA) | **23 27** | 48 | -91 | -257 | -11.0 |
| 5’-d(TAG **1** TC AAT ACT) 3’-d(ATC **1** AG TTA TGA) | **23 28** | 46 | -91 | -259 | -10.4 |
| 5’-d(TAG **1** TC AAT ACT) 3’-d(ATC **T** AG TTA TGA) | **23 29** | 44 | -85 | -242 | -9.7 |
| 5’-d(TAG **1** TC AAT ACT) 3’-d(ATC **A**AG TTA TGA) | **23 30** | 33 | -60 | -173 | -6.7 |
| 5’-d(TAG GT**G** AAT ACT) 3’-d(ATC CA **1** TTA TGA) | **31 24** | 43 | -68 | -189 | -9.2 |
| 5’-d(TAG GT**1** AAT ACT) 3’-d(ATC CA**1** TTA TGA) | **32 24** | 45 | -77 | -215 | -10.0 |
| 5’-d(TAG GT**T** AAT ACT) 3’-d(ATC CA**1** TTA TGA) | **33 24** | 41 | -75 | -213 | -8.8 |
| 5’-d(TAG GT**A** AAT ACT) 3’-d(ATC CA**1** TTA TGA) | **34 24** | 30 | -74 | -220 | -6.2 |
| a Measured in 1 M NaCl, 0.1 M MgCl2, 60 mM sodiumcacodylate buffer, pH 7.   5 M + 5 M Oligonucleotide concentration. | | | | | |

| **Table 4** Tm Values and thermodynamic data of parallel-stranded non-selfcomplementary oligonucleotide duplexes containing N8-linked 8-aza-7-deaza-2’-deoxyguanosine (**1**)a,b | | | | | |
| --- | --- | --- | --- | --- | --- |
|  |  | Tm [°C] | H° [kcal/mol] | S° [cal/(mol K)] | G°310 [kcal/mol] |
| 5’-d(TiCA TAA iCT**iG iG**AT)13 5’-d(AGT ATT GA**C C**TA) | **35 16** | 45 | -79 | -222 | -10.0 |
| 5’-d(TiCA TAA iCT**1 1**AT) 5’-d(AGT ATT GA**C C**TA) | **26 16** | 36 | -65 | -186 | -7.4 |
|  |  |  |  |  |  |
| 5’-d(TiCA TAA iCT**1 1**AT) 5’-d(AGT ATT GA**1** CTA) | **26 36** | 32 | -57 | -161 | -6.8 |
| 5’-d(TiCA TAA iCT**1 1**AT) 5’-d(AGT ATT GA **G** CTA) | **26 27** | 23 | -84 | -257 | -4.2 |
| 5’-d(TiCA TAA iCT**1 1**AT) 5’-d(AGT ATT GA**T** CTA) | **26 29** | 25 | -71 | -212 | -5.0 |
| 5’-d(TiCA TAA iCT**1 1**AT) 5’-d(AGT ATT GA**A** CTA) | **26 30** | 23 | -57 | -169 | -4.9 |
| 5’-d(TiCA TAA iCT**1 1** AT) 5’-d(AGT ATT GA**iC** CTA) | **26 18** | 28 | -63 | -184 | -6.0 |
| a Measured in 1 M NaCl, 0.1 M MgCl2, 60 mM sodiumcacodylate buffer, pH 7.  5 M + 5 M Oligonucleotide concentration . b d(iC) = m5isoCd = 2’-Deoxy-5-methylisocytidine. | | | | | |

| **Table 5** Tm Values and thermodynamic data of selfcomplementary oligonucleotidesa with parallel and antiparallel chain orientation | | | | | |
| --- | --- | --- | --- | --- | --- |
|  |  | Tm [°C] | H° [kcal/mol] | S° [cal/(mol K)] | G°310 [kcal/mol] |
| 5’-d(**1**-C-**1**-C-**1**-C)-3’   5’-d(**1**-C-**1**-C-**1**-C)-3’ | **37 37** | 34 | -55 | -158 | -6.5 |
| 5’-d(iG-C-iG-C-iG-C)-3’ 17  5’-d(iG-C-iG-C-iG-C)-3’ | **38 38** | 33 | -34 | -88 | -6.2 |
| 5’-d(**6**-C-**6**-C-**6**-C)-3’ 17, b  5’-d(**6**-C-**6**-C-**6**-C)-3’ | **39 39** | 41 | -47 | -128 | -7.8 |
| 5’-d(**40**-C-**40**-C-**40**-C)-3’ 17, c  5’-d(**40**-C-**40**-C-**40**-C)-3’ | **41 41** | 22 | -40 | -112 | -5.3 |
|  |  |  |  |  |  |
| 5’-d(**1**-iC-**1**-iC-**1**-iC)-3’ 3’-d(iC-**1**-iC-**1**-iC-**1**)-5’ | **42 42** | 37 | -45 | -122 | -6.8 |
| 5’-d(G-C-G-C-G-C)-3’18 3’-d(C-G-C-G-C-G)-5’ | **43 43** | 46 | -49 | -132 | -8.3 |
| 5’-d(**44**-C-**44**-C-**44**-C)-3’18, d 3’-d(C-**44**-C-**44**-C-**44**)-5’ | **45 45** | 62 | -60 | -166 | -12.0 |
| 5’-d(**46**-C-**46**-C-**46**-C)-3’18, e 3’-d(C-**46**-C-**46**-C-**46**)-5’ | **47 47** | 37 | -43 | -114 | -7.5 |
| a Measured in 1 M NaCl, 0.1 M MgCl2, 60 mM sodiumcacodylate buffer, pH 7.0.   5 M + 5 M Oligonucleotide concentration b **6**: c7z8iGd: 8-Aza-7-deaza-2’-deoxyisoguanosine c **40**: c7iGd: 7-Deaza-2’-deoxyisoguanosine d **44**: c7z8Gd: 8-Aza-7-deaza-2’-deoxyguanosine e **46**: c7iGd: 7-Deaza-2’-deoxyguanosine | | | | | |

**Fig.**  HPLC Profiles of the enzymatic hydrolysis of oligonucleotide (a) 5’-d(**1**-C)3 and (b) 5’-d(TAG **1** TC AAT ACT); conditions: see experimental part.
